# Supplementary material for: The Safety Limits Of An Extended Fast: Lessons from a Non-Model Organism
Source: PubMed Central journal article supplement (PMC5171797; doi:10.1038/srep39008), 2016-12-19
Supplement: srep39008-s1.pdf [file srep39008-s1.pdf]

# **The Safety Limits Of An Extended Fast: Lessons from a Non-Model Organism**

**Fabrice Bertile<sup>1,2\*</sup>, Laetitia Fouillen<sup>1,2†</sup>, Thierry Wasselin<sup>1,2</sup>, Pauline Maes<sup>1,2</sup>, Yvon Le Maho<sup>1,3</sup>, Alain Van Dorsselaer<sup>1,2</sup> and Thierry Raclot<sup>1,3</sup>**

<sup>1</sup> CNRS, UMR7178, 67037 Strasbourg, France.

<sup>2</sup> Université de Strasbourg, IPHC, Laboratoire de Spectrométrie de Masse Bio-Organique, 25 rue Becquerel, 67087 Strasbourg, France.

<sup>3</sup> Université de Strasbourg, IPHC, Département Ecologie, Physiologie et Ethologie, 23 rue Becquerel, 67087 Strasbourg, France.

\*Correspondence to: Email: [fbertile@unistra.fr](mailto:fbertile@unistra.fr) (F.B.).

† Current address: CNRS, Université de Bordeaux, UMR5200, Laboratoire de Biogenèse Membranaire, 71 Avenue Edouard Bourlaux, 33140 Villenave d'Ornon, France.

## **Supplementary Information**

**Table S1. List and annotations of the plasma proteins identified on 2-D gels in male Adélie penguins**

**Table S2. Annotations relative to single peptide-based protein identifications, with corresponding annotated mass spectra**

**Table S1. List and annotations of the plasma proteins identified on 2-D gels in male Adélie penguins**

| Spot N° | Protein                                         | NCBI Accession.version | Taxonomy            | pI / MW (Da)     | Number of peptides & tags / seq coverage (%) | Sequences of all identified peptides                                                                                                  | Mascot MS/MS ion score                     | MS-Blast HSP score           |
|---------|-------------------------------------------------|------------------------|---------------------|------------------|----------------------------------------------|---------------------------------------------------------------------------------------------------------------------------------------|--------------------------------------------|------------------------------|
| 1       | Transthyretin                                   | KFW72348.1             | Pygoscelis adeliae  | 5.07 / 16,391.42 | 13 / 76.7                                    | AADGSWQDFATGK / VEFDTSSYWK / GLGLSPFHEYADVFTANDSGHR / HYTIAALLSPFSYSTTAVVSDPQE / GSPAANVAVK / KAADGSWQDFATGK / TTEYGEIHELTTTEKFVEGIYR | 110 / 76.1 / 84.9 / 113 / 56.6 / 89 / 87.9 |                              |
|         | Chain A, Transthyretin                          | 1TFP_A                 | Gallus gallus       | 5.08 / 14,160.3  | 5 / 60.8                                     | APLVSHGSVDSK / GSPAANVAVK / KAADGSWQDFATGK / TAVVSDPE / VEGLYR / VFTANDSGHR                                                           | 60.9 / 55.4 / 112 / 63 / 56.6              | 81 / 67 / 103 / 50 / 44 / 74 |
|         | Transthyretin                                   | P27731.1               | Gallus gallus       | 5.07 / 16,309.36 | 6 / 40.0                                     | APLVSHGSVDSK / GSPAANVAVK / KAADGSWQDFATGK / TAVVSDPE / VEGLYR / VFTANDSGHR                                                           |                                            | 81 / 67 / 97 / 50 / 39 / 74  |
|         | PREDICTED: transthyretin                        | XP_010005130.1         | Chaetura pelagica   | 5.23 / 16,425.5  | 11 / 65.3                                    | AADGSWQDFATGK / GLGLSPFHEYADVFTANDSGHR / HYTIAALLSPFSYSTTAVVSDPKE / IEFDTSSYWK / KAADGSWQDFATGK                                       | 104 / 84.9 / 113 / 62.1 / 78.5             | 81 / 67 / 103 / 49 / 39 / 74 |
| 2       | PREDICTED: retinol-binding protein 4            | XP_009333082.1         | Pygoscelis adeliae  | 6.08 / 22,778.71 | 6 / 56.3                                     | APLVSHGSVDSK / GSPAANVAVK / KAADGSWQDFATGK / TAVVSDPE / VEGLYR / VFTANDSGHR                                                           |                                            |                              |
|         | Chain A, Chicken Plasma Retinol-binding Protein | 1IIU_A                 | Gallus gallus       | 5.62 / 20,079.52 | 6 / 64.4                                     | KDPEGLFLQDNVVAQFTVDENGQMSATAK / LFNNWDVCADMIGSFTDTEPAK / QLNEDGTCADSYSFVFSR / GNDDHWVVDTDYDTYALHYSCR / YSGTWYAMAK / YWGVASFLOK        | 104 / 133 / 125 / 60.4 / 57.5 / 54.5       |                              |
| 3       | PREDICTED: apolipoprotein A-I                   | XP_010722021.1         | Meleagris gallopavo | 5.58 / 30,612.11 | 16 / 42.8                                    | ELNEDGTCADSYSFVFSR / KDPEGLFLQDNVVAQFTVDENGQMSATAK / LFNNWDVCADMIGSFTDTEPAK / GNDDHWVVDTDYDTYALHYSCR / YSGTWYAMAK / YWGVASFLOK        | 94 / 104 / 133 / 71.1 / 57.5 / 54.5        |                              |
|         |                                                 |                        |                     |                  |                                              | DAIAQFESSAVGK / DMVDVYLETVK / VVEQLSNLR / GIPQAAEYQAK / IRDMVDVYLETVK                                                                 | 87.5 / 75.7 / 72.2 / 68.9 / 68.6           |                              |

|   |                                                                    |                |                                    |                                                                                                        |                                                                                                                                              |                                                                                                                                                                                                                                               |                                                                                                       |
|---|--------------------------------------------------------------------|----------------|------------------------------------|--------------------------------------------------------------------------------------------------------|----------------------------------------------------------------------------------------------------------------------------------------------|-----------------------------------------------------------------------------------------------------------------------------------------------------------------------------------------------------------------------------------------------|-------------------------------------------------------------------------------------------------------|
|   |                                                                    |                |                                    |                                                                                                        | LADNLDTLSAAAAK / LTPVAEEAR /<br>GIPQAAEYQAK / VVEQLSNLR /<br>WTEELEQFR / EDPQAPLER / EDAMPYYK /<br>YYQEVV / PLVQQYVER / YKQRLLP /<br>TPLVKDF | 81 / 63 / 81 /<br>62 / 67 / 48 /<br>41 / 40 / 39 /<br>34 / 35                                                                                                                                                                                 |                                                                                                       |
|   | PREDICTED:<br>apolipoprotein<br>A-I-like                           | XP_009894232.1 | Charadrius<br>vociferus            | 8.50 / 29,566.88                                                                                       | 14 / 39.6                                                                                                                                    | DAIAQFESSAVGK / FITLLDDLQK /<br>GIPQAAEYQAK / VVEQLSNLR                                                                                                                                                                                       | 87.5 / 62.5 / 68.9 /<br>72.2                                                                          |
|   | PREDICTED:<br>apolipoprotein<br>A-I                                | XP_009272065.1 | Aptenodytes<br>forsteri            | 8.38 / 27,219.13                                                                                       | 13 / 37.9                                                                                                                                    | LADNLDTLSAAAAK / LTPVAEEAR /<br>GIPQAAEYQAK / VVEQLSNLR /<br>WTEELEQFR / EDAMPYYK / YYQEVV /<br>PLVQQYVER / YKQRLLP / TPLVKDF                                                                                                                 | 81 / 63 / 81 /<br>62 / 67 / 41 /<br>40 / 39 / 34 /<br>35                                              |
|   | PREDICTED:<br>apolipoprotein<br>A-I                                | XP_009272065.1 | Aptenodytes<br>forsteri            | 8.38 / 27,219.13                                                                                       | 13 / 37.9                                                                                                                                    | LADNLDTLSAAAAK / VVEQLSNLR /<br>GIPQAAEYQAK<br>LADNLDTLSAAAAK / GIPQAAEYQAK /<br>WTEELEQFR / VVEQLSNLR / LTPVAEEAR /<br>LAPVAKDLK / EDAMPYYK / TPLVKDF<br>YYQEVV / PLVQQYVER / YKQRLLP                                                        | 122 / 72.2 / 68.9<br>89 / 81 / 67 /<br>62 / 55 / 43 /<br>41 / 40 / 35 /<br>33                         |
| 4 | PREDICTED:<br>complement<br>factor D                               | XP_009467440.1 | Nipponia<br>nippon                 | 6.55 / 24,580.88                                                                                       | 2 / 14.8                                                                                                                                     | DDLLLLQLEEK /<br>GDSGGPLVCSGVAEGVVTAGSR                                                                                                                                                                                                       | 99.2 / 96.5                                                                                           |
| 5 | PREDICTED:<br>adiponectin                                          | XP_009333104.1 | Pygoscelis<br>adeliae              | 5.23 / 26,650.74                                                                                       | 10 / 22.9                                                                                                                                    | APHPNVPIR / AVVFTYDQFQK /<br>IFYNEQSHYDASTGK / SAFSVGLTER<br>SAFSVGLTER / APHPNVPLR / EQSHYDA /<br>GAFVYR / VFTFMQFQ / GHNGL                                                                                                                  | 56.2 / 62.8 / 84.4 /<br>66.6<br>68 / 67 / 55 /<br>46 / 39 / 34                                        |
| 6 | PREDICTED:<br>LOW<br>QUALITY<br>PROTEIN:<br>apolipoprotein<br>A-IV | XP_009271768.1 | Aptenodytes<br>forsteri            | 4.74 / 37,955.46                                                                                       | 9 / 29.5                                                                                                                                     | AQVGQSVEELR / ETVDQLQAEITK /<br>LAASSEELR / LQDNAESIQLSPYADR /<br>MSPYAEELR / QLESLTAQMER /<br>QLNTLLETK<br>FAQEVKDGLENR / YFTELGSNAK                                                                                                         | 97.4 / 86.3 / 66.1 /<br>78.2 / 56.5 / 71.5 /<br>/ 55.7<br>63 / 72                                     |
|   | PREDICTED:<br>apolipoprotein<br>A-IV                               | XP_011600120.1 | Aquila<br>chrysaetos<br>canadensis | 4.94 / 40,901.94                                                                                       | 9 / 24.8                                                                                                                                     | AQLSPLAQELR / AQVGQSVEELR /<br>ETVDQLQAEITK / LAASSEELR /<br>MSPYAEELR / QLESLTAQMER /<br>LAPLAQQLDER<br>QEAAPL / YFTELGSNAK                                                                                                                  | 66.3 / 97.4 / 86.3 /<br>66.1 / 56.5 / 71.5 /<br>79.2<br>29 / 72                                       |
| 7 | PREDICTED:<br>Vitamin D<br>binding protein                         | XP_009322325.1 | Pygoscelis<br>adeliae              | Sequence<br>contains several<br>consecutive<br>undefined AA.<br>Its pI and Mw<br>cannot be<br>computed | 35 / nd                                                                                                                                      | DKVCQEFQALGK / HTTPDAFLGK /<br>TLLSLLTLLSNR / VCQEFQALGK /<br>ACGALLAR / DASACLDSK /<br>MPGASFEDLFLAEDAAEVFSQCDSVAED<br>CMQK / FLHEYASSYGQAPLPVLLGSTR /<br>TFLSMVSTCCISPAPTSCLK /<br>YLQPSNEELCQAFK / TLTIANSR<br>GCCAQEGLEKK / APLPVLLGSTR / | 82.8 / 68.1 / 75.9 /<br>75.3 / 63.3 / 58.2 /<br>57.8 / 56.9 / 78.6 /<br>94.8 / 65.5<br>71 / 71 / 87 / |

|                                                        |                |                         |                  |                                                                               |                                                                                                                                                                                                                                                                                                                                                                                                                                              |                                                                                                                                                                                              |
|--------------------------------------------------------|----------------|-------------------------|------------------|-------------------------------------------------------------------------------|----------------------------------------------------------------------------------------------------------------------------------------------------------------------------------------------------------------------------------------------------------------------------------------------------------------------------------------------------------------------------------------------------------------------------------------------|----------------------------------------------------------------------------------------------------------------------------------------------------------------------------------------------|
|                                                        |                |                         |                  |                                                                               | CLSPAPTSCFLK / CSNGSPFPAHPGT /<br>DFFDRFL / ECCSAK / EPSNEELCKAFK /<br>FADCCSGK / FNQCCSDVAEDC /<br>FSYLTSLAQK / GEAPLPVLL / HPPQQLP /<br>HTTVPDAFLGK / LPEAQQTNEQLC /<br>MESTCC / RFVHE / RYLFELAR / SACLD /<br>TLLANSR / TLSLLTLLSNR / VAEDCFQ /<br>VCQEFQALGK / YDASE / YLKPSNE                                                                                                                                                           | 33 / 39 / 47 /<br>73 / 62 / 68 /<br>61 / 51 / 54 /<br>79 / 86 / 38 /<br>34 / 59 / 35 /<br>45 / 67 / 43 /<br>74 / 38 / 42                                                                     |
|                                                        |                |                         |                  |                                                                               | LPEAQKPTNEQLCGEEGAR / TLTIANSR /<br>VCQEFQALGK / TLSLLTLLSNR /<br>HPPQQLPR / DKVCQEFQALGK /<br>YLQPSNEELCQAFK / HTTVPDAFLGK /<br>ESLMQTMPKASPELLGQLVEQR /<br>MPGASFEDLFLAEDAAEVFSQCCDSVAED<br>CMQK / FLHEYASSYGQAPLPVLLGSTR /<br>TFLSMVSTCCISPAPTSCFLK /<br>ASPELLGQLVEQR                                                                                                                                                                    | 95.5 / 65.5 / 75.3 /<br>88.1 / 61 / 82.8 /<br>94.8 / 72.1 / 52.6 /<br>57.8 / 64 / 78.6 /<br>56.6                                                                                             |
|                                                        | XP_009287230.1 | Aptenodytes<br>forsteri | 8.02 / 54,878.22 | 45 / 63.9                                                                     | AGCCAQEGLEKK / APLPVLLGSTR /<br>CLSPAPTSCFLK / CSNGSPFPAHPGT /<br>DFFDRFL / ECCSAK / EPSNEELCKAFK /<br>FADCCSGK / FASTCCPPNS /<br>FNQCCSDVAEDC / FSYLTSLAQK /<br>GEAPLPVLL / HPGTA / HPPQQLP /<br>HTTVPDAFLGK / LCGQYTALNFLDFK /<br>LCLAAL / LPEAQQTNEQLC / LPPFLEK /<br>MESTCC / PCCEDAGSSALSAK /<br>ETMPEASPELLANLVEQR / RFVHE /<br>RYLFELAR / SACLD / STCCPPNSPLYC /<br>TLLANSR / TLSLLTLLSNR / VAEDCFQ /<br>VCQEFQALGK / YDASE / YLKPSNE | 77 / 71 / 87 /<br>77 / 39 / 47 /<br>73 / 56 / 78 /<br>68 / 61 / 51 /<br>36 / 54 / 79 /<br>90 / 37 / 86 /<br>38 / 38 / 69 /<br>92 / 34 / 59 /<br>35 / 104 / 45 /<br>67 / 43 / 74 /<br>38 / 42 |
|                                                        |                |                         |                  |                                                                               | QQMGEELPPFLEK / TLTIANSR /<br>VTFSYLTSLAQK / VSSELGEACDGGSCLLG<br>/ HPPQQLPR                                                                                                                                                                                                                                                                                                                                                                 | 64.5 / 63.4 / 87.6 /<br>107 / 61                                                                                                                                                             |
| PREDICTED:<br>Vitamin D<br>binding<br>protein, partial | XP_010159925.1 | Eurypyga<br>helias      | 7.42 / 50,843.34 | 34 / Because<br>sequence is<br>"partial". its<br>coverage was not<br>computed | AGCCAQEGLEKK / APLPVLLGSTR /<br>CLSPAPTSCFLK / CSNGSPFPAHPGT /<br>DFFDRFL / ECCSAK / EPSNEELCKAFK /<br>FADCCSGK / FASTCCPPNS /<br>FNQCCSDVAEDC / FSYLTSLAQK /<br>GEAPLPVLL / HPGTA / HPPQQLP /<br>HTTVPDAFLGK / LCGQYTALNFLDFK /<br>LCLAAL / LPEAQQTNEQLC / LPPFLEK /<br>MESTCC / PCCEDAGSSALSAK /<br>ETMPEASPEL / RYLFELAR /<br>STCCPPNSPLYC / TLLANSR /                                                                                    | 63 / 71 / 70 /<br>74 / / 39 / 41 /<br>72 / 52 / 68 /<br>68 / 69 / 51 /<br>36 / 54 / 64 /<br>95 / 37 / 76 /<br>50 / 38 / 69 /<br>57 / 59 / 94 /<br>45 / 62 / 43 /<br>53 / 42                  |

|    |                                                                                            |                |                         |                  |           |                                                                                                                                                                                                                                                                                                                                                                                         |                                                                                                                                                                |
|----|--------------------------------------------------------------------------------------------|----------------|-------------------------|------------------|-----------|-----------------------------------------------------------------------------------------------------------------------------------------------------------------------------------------------------------------------------------------------------------------------------------------------------------------------------------------------------------------------------------------|----------------------------------------------------------------------------------------------------------------------------------------------------------------|
|    |                                                                                            |                |                         |                  |           | TLSELLTLLSNR / VAEDCFQ / VCQEFQALGK / YLKPSNE                                                                                                                                                                                                                                                                                                                                           |                                                                                                                                                                |
|    |                                                                                            |                |                         |                  |           | ADFASTCCPPNSPLYCASK / FLHEYASSYGQAPLPVLLGSTR / HPPQQLPR                                                                                                                                                                                                                                                                                                                                 | 79.2 / 64 / 61                                                                                                                                                 |
|    |                                                                                            |                |                         |                  |           | AGCCAQEGLEKK / APLPVLLGSTR / CLSPAPTSCFLK / CSNGSPFPAHPGT / DFFDRFL / ECCSAK / EPSNEELCKAFK / FADCCSGK / FASTCCPPNS / FNQCCSDVAEDC / FSYLTLAQQ / GEAPLPVLL / HPGTA / HPPQQLP / HTTVPAFLGK / CGQYTALNFLDFK / LCLAAL / LPEAQPTNEQLC / LPPFLEK / MESTCC / PCCEDAGSSALSAK / PELLGKLVEQR / RFVHE / RYLFELAR / STCCPPNSPLYC / TCCAD / TLLANSR / TLSELLTLLSNR / VAEDCFQ / VCQEFQALGK / YLKPSNE | 61 / 71 / 68 / 79 / 39 / 47 / 73 / 46 / 78 / 68 / 69 / 51 / 36 / 54 / 64 / 75 / 37 / 68 / 39 / 38 / 69 / 56 / 46 / 34 / 59 / 104 / 41 / 36 / 57 / 43 / 53 / 37 |
|    | PREDICTED:<br>LOW<br>QUALITY<br>PROTEIN:<br>vitamin D-<br>binding protein                  | XP_009873081.1 | Apaloderma<br>vittatum  | 8.15 / 52,737.52 | 34 / 57.2 |                                                                                                                                                                                                                                                                                                                                                                                         |                                                                                                                                                                |
|    |                                                                                            |                |                         |                  |           | CQCDTLCVYYQSCSDYSTVCK / FDDGALDPGYPR / LISDVWGIEGPIDAAFTR / YFYELDETSVRPGYPK                                                                                                                                                                                                                                                                                                            | 66.9 / 87.5 / 87.8 / 70.4                                                                                                                                      |
| 8  | PREDICTED:<br>Vitronectin                                                                  | XP_009463431.1 | Nipponia<br>nippon      | 5.18 / 50,508.40 | 7 / 18.2  | HEPTQ / EPEELCSR / DYSTVCK                                                                                                                                                                                                                                                                                                                                                              | 33 / 49 / 55                                                                                                                                                   |
|    | PREDICTED:<br>LOW<br>QUALITY<br>PROTEIN<br>Vitronectin                                     | XP_010283829.1 | Phaethon<br>lepturus    | 5.74 / 50,784.53 | 7 / 12.2  | FDDGALDPGYPR / LDAAMAGR / LISDVWGIEGPIDAAFTR / YFYELDETSVRPGYPK                                                                                                                                                                                                                                                                                                                         | 87.5 / 55.6 / 87.8 / 70.4                                                                                                                                      |
|    |                                                                                            |                |                         |                  |           | HEPTQ / EPEELCSR / DYSTVCK                                                                                                                                                                                                                                                                                                                                                              | 33 / 61 / 46                                                                                                                                                   |
| 9  | PREDICTED:<br>LOW<br>QUALITY<br>PROTEIN:<br>immunoglobulin<br>lambda-like<br>polypeptide 1 | XP_009329120.1 | Pygoscelis<br>adeliae   | 6.41 / 24,855.74 | 1 / 8.5   | QSNQYMASSYLTLASDVK                                                                                                                                                                                                                                                                                                                                                                      | 97.6                                                                                                                                                           |
| 10 | PREDICTED:<br>serine protease<br>inhibitor 2.1-<br>like                                    | XP_009330653.1 | Pygoscelis<br>adeliae   | 5.92 / 47,286.14 | 4 / 12.4  | LGFDGLTETR / ALLEIDEAGTEAAGATAIILTK / ATSTTLFMGK / STTLSQIFER                                                                                                                                                                                                                                                                                                                           | 82.4 / 127 / 58.1 / 65.9                                                                                                                                       |
|    | PREDICTED:<br>fibrinogen<br>gamma chain                                                    | XP_009328073.1 | Pygoscelis<br>adeliae   | 5.44 / 47,138.43 | 5 / 27.8  | DNCCILDER / DTAEIQETTGR / KGTADYAVFK / LDGSEDFR / EFGHLSRDDTTEFWLGNEK                                                                                                                                                                                                                                                                                                                   | 61.5 / 70.5 / 67.3 / 59 / 61                                                                                                                                   |
| 11 | PREDICTED:<br>lipocalin-like                                                               | XP_009288939.1 | Aptenodytes<br>forsteri | 9.23 / 24,741.85 | 9 / 31.5  | EQGLTDEEILIPR / MCTTVISATADGNLEVTSTYPK / STGSSTMVLLYSR                                                                                                                                                                                                                                                                                                                                  | 97 / 145 / 81.2                                                                                                                                                |

|    |                                                                                            |                |                       |                  |                                                                              |                                                                                                                                                                                                                                                                                                                                                            |                                                                                                                                         |
|----|--------------------------------------------------------------------------------------------|----------------|-----------------------|------------------|------------------------------------------------------------------------------|------------------------------------------------------------------------------------------------------------------------------------------------------------------------------------------------------------------------------------------------------------------------------------------------------------------------------------------------------------|-----------------------------------------------------------------------------------------------------------------------------------------|
|    |                                                                                            |                |                       |                  |                                                                              | LSATADGNLEVTGMYPK / GSSTMVLLYSR / ALVATQLSK / SYTSPR / ELLLLP / LPVQTD                                                                                                                                                                                                                                                                                     | 98 / 77 / 57 / 45 / 36 / 38                                                                                                             |
|    |                                                                                            |                |                       |                  |                                                                              | QSNQYMASSYLTLASDWK                                                                                                                                                                                                                                                                                                                                         | 108                                                                                                                                     |
|    | PREDICTED:<br>LOW<br>QUALITY<br>PROTEIN:<br>immunoglobulin<br>lambda-like<br>polypeptide 1 | XP_009329120.1 | Pygoscelis<br>adeliae | 6.41 / 24,855.74 | 1 / 8.5                                                                      |                                                                                                                                                                                                                                                                                                                                                            |                                                                                                                                         |
| 12 | Ig lambda<br>chain V-1<br>region, partial                                                  | KFW61302.1     | Pygoscelis<br>adeliae | 6.19 / 6,395.03  | 1 / Because<br>sequence is<br>"partial". its<br>coverage was not<br>computed | VPGSAPVTVIYANDK                                                                                                                                                                                                                                                                                                                                            | 114                                                                                                                                     |
|    | Ig lambda-1<br>chain C<br>regions, partial                                                 | KFQ94409.1     | Nipponia<br>nippon    | 6.91 / 11,720.02 | 1 / Because<br>sequence is<br>"partial". its<br>coverage was not<br>computed | ATLVCLLGDFYPR                                                                                                                                                                                                                                                                                                                                              | 97.5                                                                                                                                    |
| 13 | lactate<br>dehydrogenase<br>A                                                              | XP_011574069.1 | Columba livia         | 8.19 / 36,602.51 | 1 / 3.6                                                                      | VIGSGCNLDSAR                                                                                                                                                                                                                                                                                                                                               | 68.7                                                                                                                                    |
| 14 | PREDICTED:<br>Fibrinogen beta<br>chain                                                     | XP_009328071.1 | Pygoscelis<br>adeliae | 8.11 / 54,568.40 | 18 / 52.7                                                                    | AVVDSLH / DNDGWL TADSR /<br>LENAIATQVDYCR /<br>LSETSTTFYEYMTVLDNK /<br>SPCVVSCNIPVVS GK /<br>IGPTEVLIEMEDWNGDK /<br>NYCDTPGEYWLGN DK / YQLSVSNYK /<br>AYCDMQTDNGGWTLIQNR /<br>DNLN NIPSSLR / HGTDDGVVWMNWK /<br>HPLDELGVLCPTGCELQTTLVK /<br>TMTIHNGMFFSTYDR /<br>VSAHYGGFTIQNEGK /<br>YYWGGTYSWDMAK /<br>KDND DILSQYNTEVELHYN YIK /<br>EDGGGWYNR / GFGNVAK | 53.3 / 88.9 / 85.1 /<br>124 / 91.7 / 115 /<br>94.6 / 71.2 / 91.2 /<br>58.1 / 103 / 72.4 /<br>58.7 / 97.6 / 82.8 /<br>53.5 / 61.7 / 39.7 |
| 15 | Ig gamma<br>chain C region,<br>partial                                                     | EMC81142.1     | Columbia livia        | 4.72 / 10,826.22 | 1 / Because<br>sequence is<br>"partial". its<br>coverage was not<br>computed | GFYPEDVSVVQK                                                                                                                                                                                                                                                                                                                                               | 76.7                                                                                                                                    |
|    | Ig heavy chain<br>V-III region                                                             | KFQ92087.1     | Nipponia<br>Nippon    | 5.10 / 6,711.43  | 1 / Because<br>sequence is                                                   | STVTLQMNSLK                                                                                                                                                                                                                                                                                                                                                | 59.5                                                                                                                                    |

|    |                                                         |                |                        |                  |                                                                  |                                                                                                                                                                                                                                                                                                                                                                                                                                                              |                                                                                                                                                                                  |
|----|---------------------------------------------------------|----------------|------------------------|------------------|------------------------------------------------------------------|--------------------------------------------------------------------------------------------------------------------------------------------------------------------------------------------------------------------------------------------------------------------------------------------------------------------------------------------------------------------------------------------------------------------------------------------------------------|----------------------------------------------------------------------------------------------------------------------------------------------------------------------------------|
|    | VH26, partial                                           |                |                        |                  | “partial”. its coverage was not computed                         |                                                                                                                                                                                                                                                                                                                                                                                                                                                              |                                                                                                                                                                                  |
|    |                                                         | KFP43328.1     | Chlamydotis macqueenii | 8.11 / 6,122.75  | 1 / Because sequence is “partial”. its coverage was not computed | ADDTATYFCAK                                                                                                                                                                                                                                                                                                                                                                                                                                                  | 72.4                                                                                                                                                                             |
|    |                                                         |                |                        |                  |                                                                  | DNCCILDER / IIEEIR /<br>FGSYCPTTCGIADFFNK / GTADYAVFK /<br>QTLPSVDDFTKR / DTAEIQETTGR /<br>FAGNCAEQDGSWWMNR /<br>IAQLESHCQPCR /<br>DASPAGYDNGIHWATWR / IELEDWSGK /<br>KGTADYAVFK / LDGSEDFR /<br>LPVDGQQHNLGSAK /<br>YHLTMDNELQEMER /<br>EGFGHLSPDDTTEFWLGNEK /<br>LTYAYFIGGEAGDAFGGFDFGDDPSDK /<br>QTLPSVDDFTK / VGSEEDKYR /<br>YYIGGVYTSK /<br>QSFLVYCEIDSYGNGWTVIQR /<br>YENTILSHESTIQQLTDTHMLNSK / KIIEEIR<br>/ IHSITIQSTLPYTLR /<br>SFTYHNGMQFSTYDNDNDK | 78.1 / 58 / 92.7 /<br>70.9 / 70 / 89.4 /<br>106 / 76.6 / 113 /<br>65.6 / 73.6 / 64.6 /<br>98.8 / 103 / 88.5 /<br>130 / 74.8 / 82.6 /<br>71.2 / 133 / 59.1 /<br>57.8 / 104 / 56.3 |
| 16 | PREDICTED:<br>fibrinogen<br>gamma chain                 | XP_009328073.1 | Pygoscelis adeliae     | 5.44 / 47,138.43 | 26 / 73.8                                                        | VYCELDSYGNGWTVLKR / TLPYMLR /                                                                                                                                                                                                                                                                                                                                                                                                                                | 121 / 39                                                                                                                                                                         |
|    | PREDICTED:<br>alpha-1-<br>antitrypsin-like              | XP_009330651.1 | Pygoscelis adeliae     | 5.41 / 48,275.19 | 17 / 52.2                                                        | DSDFLDAK / ETVSNWMSLEK /<br>GNAALFVLPDEGTMK /<br>LSDTVMVLVNYIFFK /<br>DENLSCWVVEIPYK /<br>FLDDVTNFYNSEAISSNFQNSPEATK /<br>MGVTEVFSDEADLSGVAEK / FSISGSYDVK<br>/ IAPSNANFAFR / IVNPAAKED /<br>TTYGILFMGK / IVNPAAK /<br>KLSDTVMVLVNYIFFK /<br>SNLNDEQQEQK/ EVQLSIGNALFIDDR<br>/ GYWEKPFNNLVTR / KIYLDLPK                                                                                                                                                      | 69.8 / 88.3 / 84.8 /<br>114 / 88.2 / 80.6 /<br>144 / 75.8 / 94.3 /<br>69.5 / 70.3 / 40.7 /<br>85.6 / 62 / 92.6 /<br>58.7 / 57.7                                                  |
|    | PREDICTED:<br>serine protease<br>inhibitor 2.1-<br>like | XP_009330653.1 | Pygoscelis adeliae     | 5.92 / 47,286.14 | 4 / 15                                                           | LGFDGLTETR /<br>NVFFSPMSISTAFAMLAVGAK /<br>ALLEIDEAGTEAAGATAIILTK /<br>ATSTTLFMGK                                                                                                                                                                                                                                                                                                                                                                            | 93.7 / 137 / 125 /<br>58.8/                                                                                                                                                      |
|    | PREDICTED:a<br>lpha-1-<br>antiproteinase                | XP_009330650.1 | Pygoscelis adeliae     | 5.94 / 47,437.45 | 6 / 15.7                                                         | GEAIACLK / QLEQTLVK /<br>DMDPQTVMLLASVFFK /<br>LVPNNADFAFQFFK / EFFVDAETTVK /                                                                                                                                                                                                                                                                                                                                                                                | 54.8 / 62.7 / 122 /<br>83.9 / 54.8 / 59                                                                                                                                          |

| 2-like                         |                                                                      |                |                          |                  | QINDYIER  |                                                                                                                                                                                                                                                                      |                       |
|--------------------------------|----------------------------------------------------------------------|----------------|--------------------------|------------------|-----------|----------------------------------------------------------------------------------------------------------------------------------------------------------------------------------------------------------------------------------------------------------------------|-----------------------|
| 17                             | PREDICTED:<br>serum albumin<br>isoform X2                            | XP_009323154.1 | Pygoscelis<br>adeliae    | 5.53 / 68,668.91 | 31 / 54.7 | ESDVGACLDEK / TIADGFTAMVDK /                                                                                                                                                                                                                                         | 66.7 / 97.7 / 73.7 /  |
|                                |                                                                      |                |                          |                  |           | AELMTYMCSK / DSYGAMADCCSK /                                                                                                                                                                                                                                          | 63.5 / 122 / 68.4 /   |
|                                |                                                                      |                |                          |                  |           | LPCSEGYLSIVMQDMcR /                                                                                                                                                                                                                                                  | 134 / 149 / 68.7 /    |
|                                |                                                                      |                |                          |                  |           | MPQVSTDTLIEIGK /                                                                                                                                                                                                                                                     | 59.1 / 73.8 / 106 /   |
|                                |                                                                      |                |                          |                  |           | QSDIDTCFGEEGANLIVQSR /                                                                                                                                                                                                                                               | 100 / 106 / 85.8 /    |
|                                |                                                                      |                |                          |                  |           | SQCIEADFDQPEGLPSLVER /                                                                                                                                                                                                                                               | 72.3 / 64.4 / 55.1 /  |
|                                |                                                                      |                |                          |                  |           | YNDLKEETFK / RHPEFSTQLILR /                                                                                                                                                                                                                                          | 70.9 / 61.4 / 60 /    |
|                                |                                                                      |                |                          |                  |           | RPCFTAMGVDTK / ECCEGDMVECMDDR /                                                                                                                                                                                                                                      | 54.9 / 59.8 / 84.6 /  |
|                                |                                                                      |                |                          |                  |           | RQETTPINDNVSHCCSDSYAYR /                                                                                                                                                                                                                                             | 75.7 / 57.2           |
|                                |                                                                      |                |                          |                  |           | TNCELLTAQGETGFLK / AVTMITFAQYLQR<br>/ KMPQVSTDTLIEIGK / APLSEMLK /<br>LLVNLIK / YVPPAFDPEMFSFDEK /<br>LVKDVVDLAQK / MPQVSTDTLIEIGKK /<br>ADKLALLSQK /<br>CVANEDAPECTKPLPSIFLDEICQVEK/<br>REPLYAPTILSLAADYEHALQTCK /<br>RLPCSEGYLSIVMQDMCR /<br>QETTPINDNVSHCCSDSYAYR |                       |
| CEGDMVECMDDR / RYAEFSTQLLLR /  | 103 / 64 / 61 /                                                      |                |                          |                  |           |                                                                                                                                                                                                                                                                      |                       |
| HCCSAMYAYR / FVYEYAR / FADCCSK | 58 / 47                                                              |                |                          |                  |           |                                                                                                                                                                                                                                                                      |                       |
| 18                             | PREDICTED:<br>fibrinogen<br>alpha chain                              | XP_009328072.1 | Pygoscelis<br>adeliae    | 7.01 / 59,104.70 | 7 / 17.3  | MSSSDGSDCSYLQAGSVGR /                                                                                                                                                                                                                                                | 67.2 / 87 / 67.6 / 66 |
|                                |                                                                      |                |                          |                  |           | TVVTSASSSFNK /                                                                                                                                                                                                                                                       | / 57.2 / 72.8 / 59.1  |
| 18                             | PREDICTED:<br>multiple<br>inositol<br>polyphosphate<br>phosphatase 1 | XP_005530788.1 | Pseudopodoces<br>humilis | 6.05 / 50,597.88 | 1 / 2     | LFPELNPFFTPDSSSTAGR / LLAENQNNYK /<br>GDSLHYHIAESR / NWPICADDDWGTK /<br>SFDYQVDK                                                                                                                                                                                     |                       |
|                                |                                                                      |                |                          |                  |           | CLQSGAAFR                                                                                                                                                                                                                                                            | 65.4                  |
| 19                             | PREDICTED:<br>beta-2-<br>glycoprotein 1                              | XP_009322046.1 | Pygoscelis<br>adeliae    | 8.53 / 38,637.59 | 2 / 5.7   | AVVLYNGEK / WPLNTLLCLPK                                                                                                                                                                                                                                              | 55.7 / 65             |
|                                |                                                                      |                |                          |                  |           | PREDICTED:<br>Gelsolin                                                                                                                                                                                                                                               | XP_009320302.1        |



|    |                                                                                                                   |                |                       |                      |                                                                                                                                                                    |                                                                                                                                                                                                                                           |                                                                                                                |
|----|-------------------------------------------------------------------------------------------------------------------|----------------|-----------------------|----------------------|--------------------------------------------------------------------------------------------------------------------------------------------------------------------|-------------------------------------------------------------------------------------------------------------------------------------------------------------------------------------------------------------------------------------------|----------------------------------------------------------------------------------------------------------------|
|    |                                                                                                                   |                |                       |                      | AVELDPTASQLNSNDAFVLK /<br>GAAAIFTVQMDDYLQGK /<br>VPVDPSTYGGQFYGGDSYIVLYNYQHAGK /<br>NLYGDFFTGDSYLVLNTIK /<br>EEMLQVLGPKPSLPPGVSDETR /<br>IEKVPFDAATLHTSK / TPVTVVK |                                                                                                                                                                                                                                           |                                                                                                                |
| 20 | PREDICTED:<br>prothrombin                                                                                         | XP_009327994.1 | Pygoscelis<br>adeliae | 5.84 / 69,290.71     | 10 / 22.3                                                                                                                                                          | ELLESYMGGR / GDACEGDSGGPFVMK /<br>IALLDNIIHPR / TTVEFTPR /<br>WYQVGIVSWGEGCDR /<br>NPDNNSEGPWCYTR / SGIECQMWTSK /<br>VMLSAPVEPCEQEK /<br>VTDNMFCAGYSPEDSQR /<br>VYVGDDAEVGSPPWQVMLYK                                                      | 63.1 / 98.9 / 54.3 /<br>71.6 / 100 / 67.4 /<br>63.5 / 65.2 / 68.1 /<br>95.6                                    |
|    | PREDICTED:<br>kininogen-1                                                                                         | XP_009320013.1 | Pygoscelis<br>adeliae | 6.41 / 68,647.09     | 9 / 21.2                                                                                                                                                           | DQFQDLTPECK /<br>LPVEDTVNPDTCSCGPETIPK /<br>LSEDCEATSDSAPLPCEAR / SFAVLDQPNK<br>/ TAGPDTQFYVK / AAGNQFALYVVMEAK /<br>GGEIEAATVQVVAGQNYR /<br>YNSESDDDFYK / IQETTCATEENK                                                                   | 69.8 / 83.3 / 106 /<br>81.3 / 72.4 / 88.9 /<br>104 / 85.6 / 72.9                                               |
| 21 | PREDICTED:<br>soluble<br>scavenger<br>receptor<br>cysteine-rich<br>domain-<br>containing<br>protein<br>SSC5D-like | XP_009328517.1 | Pygoscelis<br>adeliae | 4.67 / 50,945.95     | 30 / 48.1                                                                                                                                                          | DQIWLSDMK / DVWGTICDDQWDLR /<br>DVWGTVCDDQWDLR / GPDMIWLDDVK /<br>QLGCGDAVLAFIGAK / QLGCGTAVSAPR /<br>VEVLHENR / QVGCSPSALGGAR /<br>YGEGKDQIWLSDMK / WGSVCDDHWDMMK<br>/ VEVLHEEQWGSVCHDNWDLNDAQVVCK                                       | 72.5 / 84.3 / 94.9 /<br>87 / 87.3 / 84.9 /<br>65.6 / 98.8 / 76.9 /<br>54.2 / 68.7                              |
|    |                                                                                                                   |                |                       |                      |                                                                                                                                                                    | GCGSPLSALGGAR / DLNDAQVVCK /<br>GPDMLWLDDV / GTLCDDKWELR /<br>NASAVCSDSGLTV / SLTECEAK /<br>QLGCSTAVSAP / VEVLHENR / HNCYH /<br>QLGCSAAVSA / CDDQWD / AKVVCK /<br>GELWLSL / VGGPNR / ASLTECEA /<br>DADVCAVVK / ECQAR / GTEVPE /<br>VSTSVR | 84 / 74 / 79 /<br>69 / 82 / 57 /<br>51 / 60 / 46 /<br>51 / 48 / 44 /<br>44 / 43 / 56 /<br>74 / 34 / 44 /<br>41 |
| 22 | PREDICTED:<br>inter-alpha-<br>trypsin<br>inhibitor heavy<br>chain H2                                              | XP_009326966.1 | Pygoscelis<br>adeliae | 6.07 / 82,701<br>.39 | 9 / 17.1                                                                                                                                                           | AADQFSLIDFNHNVR /<br>DNLVSATPAQVEDAK /<br>GCCPGTLGLTPNAPNNK /<br>IFGNQETSAQMK / LANTMIQAK /<br>SPPVSSLSINR / IIEPQGLR / SNALDMENFK /<br>VDTENLQHLESIVTATAANAELVMETLR                                                                      | 55.2 / 92.9 / 74.8 /<br>92.4 / 69.1 / 77.8 /<br>55.5 / 57.4 / 50.8                                             |

|         |                                                             |                                    |                         |                       |                      |                                                                                                                                                                                                                                                                                                                                     |                                                                                                                                          |
|---------|-------------------------------------------------------------|------------------------------------|-------------------------|-----------------------|----------------------|-------------------------------------------------------------------------------------------------------------------------------------------------------------------------------------------------------------------------------------------------------------------------------------------------------------------------------------|------------------------------------------------------------------------------------------------------------------------------------------|
| 23      | PREDICTED:<br>alpha-2-<br>macroglobulin                     | XP_009328552.1                     | Pygoscelis<br>adeliae   | 6.04 /<br>165,228.83  | 18 / 16.5            | ANAFCTSADTGFGLSPTVSLR /<br>LVDGSGAPIANEIVR / SETLSCGSSTEVR /<br>SGGDFQQDFQVDPTNR / TGQLSEEVK /<br>FYATFSTPEELTETVR / HTDGSYSTFGPR /<br>ASPNSLCAVR / ETTQNSVLCVK /<br>MLSGFIPVK / SLIDDVSEK /<br>FLLLLPSNVVQDSGR / TVAWLVTPK /<br>AVCDEFSGQTDNYGCISEMVK /<br>VYDYETDEFATQEYSAPCTAVK /<br>KFEHADTACYGEEAK / VITILDEK /<br>AIGYLVSGYQR | 114 / 96.6 / 104 /<br>77.7 / 76.2 / 75.8 /<br>56.6 / 68.8 / 60.5 /<br>55.5 / 59.7 / 61.4 /<br>62.6 / 55.6 / 76.2 /<br>62.8 / 72.3 / 60.9 |
|         |                                                             | XP_009278797.1                     | Aptenodytes<br>forsteri | 5.85 /<br>164,837.59  | 11 / 10.9            | ANAFCTSADTGFGLSPTVSLR /<br>ASPNSLCAVR / ETTQNSVLCVK /<br>IKEEETGVELIGTSFSEITTTISK /<br>LVDGSGAPIANEIVR / SETLSCGSSTEVR /<br>SGGDFQQDFQVDPTNR / TGQLSEEVK /<br>FLLLLPSNVVQDSGR / HTDGSYSTFGPR /<br>SNSQSPVTFITVTVK                                                                                                                   | 123 / 60.9 / 56 /<br>63.4 / 85.9 / 116 /<br>63 / 60.6 / 55.2 /<br>57.3 / 57.3                                                            |
| 24 & 25 | PREDICTED:<br>complement<br>component C7                    | XP_009322654.1                     | Pygoscelis<br>adeliae   | 6.38 / 93,085.12      | 6 / 8.8              | CFSGQCISR / CGSNLQWQVGDR /<br>QAIEEYMAENDPCK / YSLTNAENCK /<br>ELANLPVVYEYNIYR / LSESVLAYTFQVK /                                                                                                                                                                                                                                    | 62 / 85.3 / 84.7 /<br>59.8 / 68.1 / 79.4                                                                                                 |
| 26      | PREDICTED:<br>LOW<br>QUALITY<br>PROTEIN<br>Complement<br>C3 | XP_009322238.1                     | Pygoscelis<br>adeliae   | 6.62 /<br>187,591.23  | 1 / 1                | IEGDHNAHVGLVAVDK                                                                                                                                                                                                                                                                                                                    | 58.4                                                                                                                                     |
|         |                                                             | Complement<br>factor H,<br>partial | KFW68593.1              | Pygoscelis<br>adeliae | 7.47 /<br>126,405.91 | 1 / Because<br>sequence is<br>"partial". its<br>coverage was not<br>computed                                                                                                                                                                                                                                                        | LSEYMENYK                                                                                                                                |
| 27      | PREDICTED:<br>plasminogen                                   | XP_009323838.1                     | Pygoscelis<br>adeliae   | 7.82 / 90,611.88      | 11 / 16.3            | DQQLTLAENTK / GTASFTLTGK /<br>NPDGEPQPWCFTTSPTK / TEGAWLLNPK /<br>VDIALIK / TADQFPNADLK /<br>NPDGDVNGPWCYTTDPR /<br>YPNAGLEENYCR / CTTPPPVPAPGR /<br>CQAWSSMSPHR / GPWCYTTPATR                                                                                                                                                      | 105 / 73 / 64.1 /<br>56.1 / 51.3 / 65.6 /<br>64.1 / 81.6 / 57.5 /<br>64.7 / 66.5                                                         |
| 28      | PREDICTED:<br>fibrinogen<br>alpha chain                     | XP_009328072.1                     | Pygoscelis<br>adeliae   | 7.01 / 59,104.70      | 11 / 27              | MSSSDGSDCSYLQGAGSVGR /<br>TVVTSASSFNK /<br>LFPELNPFFTPDSSSTAGR /<br>ALQSSIQEQVEMK / LLAENQNNYK /<br>GDSLHYHIAESR / MQGLIDETDQDYSHR /                                                                                                                                                                                                | 150 / 90.4 / 83.5 /<br>115 / 71.2 / 75.7 /<br>80.6 / 60.5 / 55 /<br>59.2 / 60                                                            |

|    |                                      |                |                       |                  |                                                                                                                                                                                                                                                                                                                                                                                                                                                                                                                     |                                                                                                                                                                                                                                                                                                                                                                                                                                                                                                                                                            |
|----|--------------------------------------|----------------|-----------------------|------------------|---------------------------------------------------------------------------------------------------------------------------------------------------------------------------------------------------------------------------------------------------------------------------------------------------------------------------------------------------------------------------------------------------------------------------------------------------------------------------------------------------------------------|------------------------------------------------------------------------------------------------------------------------------------------------------------------------------------------------------------------------------------------------------------------------------------------------------------------------------------------------------------------------------------------------------------------------------------------------------------------------------------------------------------------------------------------------------------|
|    |                                      |                |                       |                  | NWPICADDDWGTK /<br>FVTGPDGPREEVVEK / SFDYQVDK /<br>QMQVVLER                                                                                                                                                                                                                                                                                                                                                                                                                                                         |                                                                                                                                                                                                                                                                                                                                                                                                                                                                                                                                                            |
|    | PREDICTED:<br>pyruvate kinase<br>PKM | XP_009318184.1 | Pygoscelis<br>adeliae | 7.94 / 60,260.51 | 1 / 2.9                                                                                                                                                                                                                                                                                                                                                                                                                                                                                                             | FGVEQNVDMMVFASFIR 60.7                                                                                                                                                                                                                                                                                                                                                                                                                                                                                                                                     |
|    |                                      |                |                       |                  | AISNNEADAISLDSGQVFEAGLAPYK /<br>ANIMAYR / DDSKVDDIWSFLSK /<br>DHMQHESVALNCLQK /<br>DSEGS AISYYTVAVVK / KGTDF TINN LQ GK<br>/ WCTISSAEENK / AGE PASYFAVAVVK /<br>DGKGDVAFVK /<br>ESGSIEQAVANFFSASCVPGATTEQK /<br>GTDFTINN LQ GK / SDSVITWNN LQ GK /<br>VDDIWSFLSK / FGVGTTSTFQLFGPPGK /<br>MDEFELLCTNGQR / GDVAFIK /<br>KSDSVITWNN LQ GK / GDVAFVK /<br>HTTVQENAPEEKDEYELLCLDGSR /<br>SKCDLWSVVSNGEVECTVADNTEDCIK /<br>TAPYSGYSGAFHCLK / HSIVEENTDGK /<br>SAGWNIPIG TLLQR /<br>VCHWATVPAHAVVAR /<br>WCTISSAEENKCNLSR | 161 / 56.3 / 84.1 /<br>74.6 / 119 / 101 /<br>79 / 109 / 63.5 /<br>93.7 / 82.7 / 86.7 /<br>77.8 / 106 / 87.3 /<br>54.2 / 118 / 51.3 /<br>80.1 / 64.5 / 71.3 /<br>74.6 / 59.4 / 91.2 /<br>91.7                                                                                                                                                                                                                                                                                                                                                               |
| 29 | PREDICTED:<br>serotransferrin        | XP_009321153.1 | Pygoscelis<br>adeliae | 7.61 / 77,423.99 | 63 / 56.5                                                                                                                                                                                                                                                                                                                                                                                                                                                                                                           | ADALSLDSG / 48 / 112 / 54 /<br>ADALSLDSGKVFEAAVAPYK / ANLMAYR /<br>APGSPNSR / APYSGYGS AFH / ATYLDCLK<br>/ CAVGK / DEFELLCTNGQR /<br>DGKGDVAFVK / DLLFK / DSALKLK /<br>EDMTQWC / EFELLCTNG /<br>EKDEYELLCLDGSR / EPASYFAVAVVK /<br>FFAVAVAR / FTLNNLQ GK /<br>GSALSYYTVAVVK / HSLVEEETNGK /<br>KGTDFTLNNLQ GK / KVDDLWSFLSK /<br>LCQLC / LCELCK / LQPLAAEVY /<br>NFEEYFSEGCAPGSP / NLPLGTLLKR /<br>NPSDLLQVCTFL / AVANFFSASCV /<br>SALQSL / SYYTVAVV / TSCHTGLGR /<br>TTSTFELFGP / VALNCLQK /<br>WCTLSSAEENK / WNNLQ GK / WNVLSN /<br>YFSEGCAPG / YGYTGAFR |
| 30 | PREDICTED:<br>angiotensinogen        | XP_009327462.1 | Pygoscelis<br>adeliae | 5.10 / 50,279.95 | 12 / 31.4                                                                                                                                                                                                                                                                                                                                                                                                                                                                                                           | AVDFTNPGEAAK / ISDANLTVGK /<br>LASGGTDQPEDPAAQK / MIESLIESR /<br>TDASGIFSVVEVPISK /<br>IEGSSDLQELLADMELPALLGK /                                                                                                                                                                                                                                                                                                                                                                                                                                            |

|                        |                |                       |                  |         |                                |                |
|------------------------|----------------|-----------------------|------------------|---------|--------------------------------|----------------|
|                        |                |                       |                  |         | STCEELESLVQEGK                 |                |
|                        |                |                       |                  |         | DLDPSTNLLMVVDVR / EPKEFWVDSN / | 93 / 72 / 86 / |
|                        |                |                       |                  |         | AVDFTNPGEAAK / QLNAFVEAK /     | 64 / 65        |
|                        |                |                       |                  |         | VPFLSVTGTFK                    |                |
| PREDICTED:<br>fetuin-B | XP_009320015.1 | Pygoscelis<br>adeliae | 5.01 / 45,162.38 | 2 / 4.9 | AIIYINQAR / YLEAAVQSLAK        | 66.4 / 95.8    |

Table S1 summarizes annotations of all the identified proteins, which were extracted from the Scaffold software (Proteome Software, v3.6.5), computed from [www.expasy.org/tools/pi-tool](http://www.expasy.org/tools/pi-tool), or extracted from MS-Blast searches. The theoretical isoelectric points (pI) and molecular weights (MW) of identified *Pygoscelis adeliae* proteins were consistent with those observed on 2-D gels.

The MS/MS data were interpreted using a local Mascot™ server (Mascot version 2.5.1, Matrix Science, London, UK). Spectra were searched with a tolerance of 0.5 Da on mass measurements, both in MS and MS/MS modes. A maximum of one trypsin missed cleavage per peptide was allowed, and carbamidomethylation of cysteine, oxidation of methionine and acetylation of protein N-termini were specified as variable modifications. The Scaffold software (v.3.6.5, Proteome software Inc., Portland, OR, USA) was used in order to validate identifications using the following criteria. Hence, spectra were searched against a target-decoy version of the NCBI nr database restricted to *Aves* (Taxonomy ID: 8782) downloaded in July 2015 (3270982 target+decoy entries). Protein identifications were validated when peptides with high quality MS/MS spectra were detected (in the case of more than 2 peptides-based identification, MS/MS ion scores higher than 39.7; in the case of single peptide-based identification, MS/MS ion score higher than 57).

In addition to classical Mascot searches, complete or partial amino acid sequences were determined on the non-assigned MS/MS spectra through automatic *de novo* sequencing, which was performed using the PEAKS Studio software (v4.5; Bioinformatics Solutions, Waterloo, Canada). All deduced sequence tags were submitted to the MS-BLAST program to perform cross-species protein identifications on the basis of sequence similarity. Identifications were validated for best hits according to threshold scores, which were as follows: 102 for the summed score of 2 HSPs, 136 for the summed score of 3 HSPs, and 200 for the summed score of 4 or more HSPs.

**Table S2. Annotations relative to single peptide-based protein identifications, with corresponding annotated mass spectra**

| Spot N° | Protein | NCBI Accession.version | pI / MW (Da) | Peptide sequence | Mascot MS/MS ion score | Modifications | Observed m/z | Actual peptide mass (AMU) | Charge | Error on peptide mass (PPM) |
|---------|---------|------------------------|--------------|------------------|------------------------|---------------|--------------|---------------------------|--------|-----------------------------|
|---------|---------|------------------------|--------------|------------------|------------------------|---------------|--------------|---------------------------|--------|-----------------------------|

PREDICTED: LOW QUALITY PROTEIN: immunoglobulin lambda-like polypeptide 1

|                |                 |                     |      |           |         |         |   |    |
|----------------|-----------------|---------------------|------|-----------|---------|---------|---|----|
| XP_009329120.1 | 6.41 / 24741.85 | QSNNKYMASSYLTLASDWK | 97.6 | Oxidation | 1155.58 | 2309.14 | 2 | 34 |
|----------------|-----------------|---------------------|------|-----------|---------|---------|---|----|

9

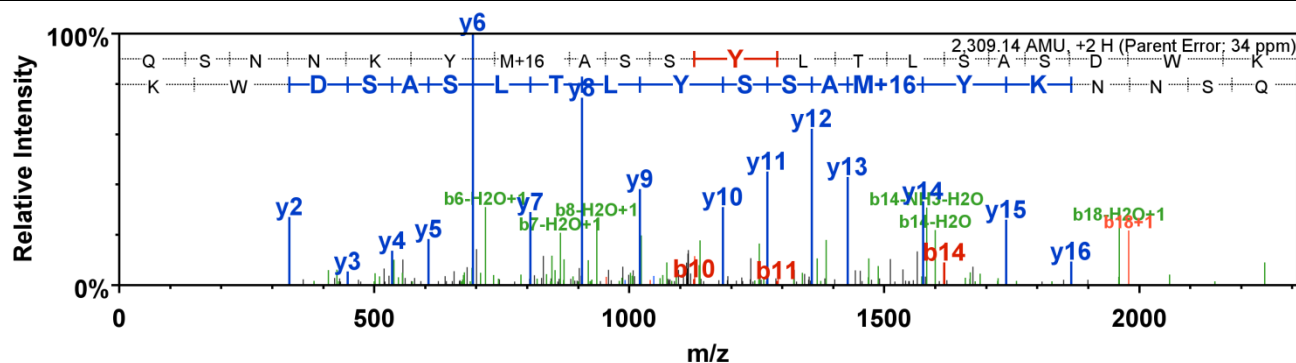

PREDICTED: LOW QUALITY PROTEIN: immunoglobulin lambda-like polypeptide 1

|                |                 |                     |     |           |         |         |   |    |
|----------------|-----------------|---------------------|-----|-----------|---------|---------|---|----|
| XP_009329120.1 | 6.41 / 24741.85 | QSNNKYMASSYLTLASDWK | 108 | Oxidation | 1155.58 | 2309.14 | 2 | 34 |
|----------------|-----------------|---------------------|-----|-----------|---------|---------|---|----|

12

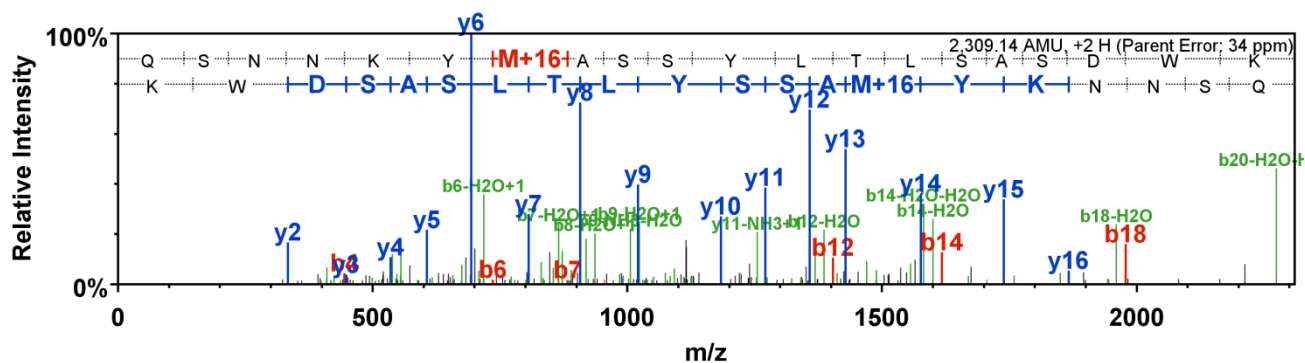

|                                        |            |                |                 |     |      |        |          |   |     |
|----------------------------------------|------------|----------------|-----------------|-----|------|--------|----------|---|-----|
| Ig lambda chain<br>V-1 region, partial | KFW61302.1 | 6.19 / 6395.03 | VPGSAPVTVIYANDK | 114 | None | 765.89 | 1,529.76 | 2 | -31 |
|----------------------------------------|------------|----------------|-----------------|-----|------|--------|----------|---|-----|

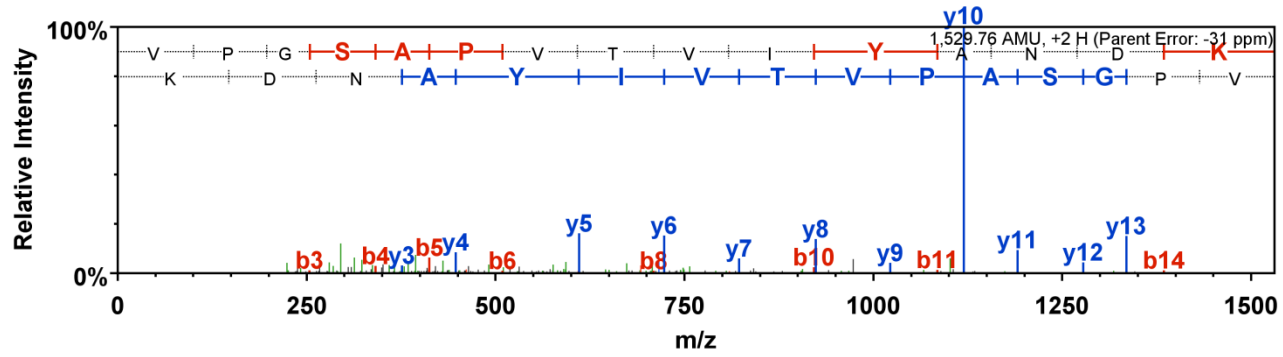

12

|                                         |            |                 |               |      |                           |        |          |   |     |
|-----------------------------------------|------------|-----------------|---------------|------|---------------------------|--------|----------|---|-----|
| Ig lambda-1 chain<br>C regions, partial | KFQ94409.1 | 6.91 / 11720.02 | ATLVCLLGDFYPR | 97.5 | Carbamido-<br>methylation | 762.88 | 1,523.75 | 2 | -18 |
|-----------------------------------------|------------|-----------------|---------------|------|---------------------------|--------|----------|---|-----|

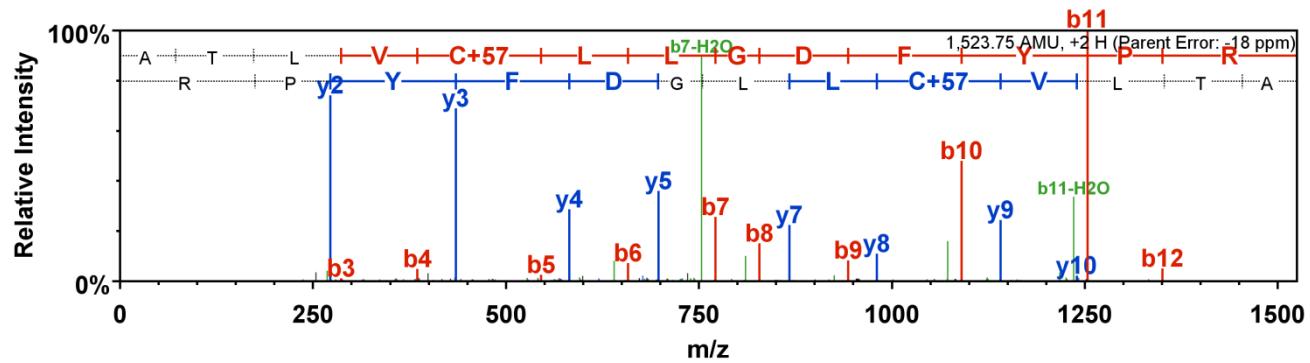

|                         |                |                 |              |      |                       |        |         |   |    |
|-------------------------|----------------|-----------------|--------------|------|-----------------------|--------|---------|---|----|
| lactate dehydrogenase A | XP_011574069.1 | 8.19 / 36602.51 | VIGSGCNLDSAR | 68.7 | Carbamido-methylation | 624.82 | 1247.62 | 2 | 23 |
|-------------------------|----------------|-----------------|--------------|------|-----------------------|--------|---------|---|----|

13

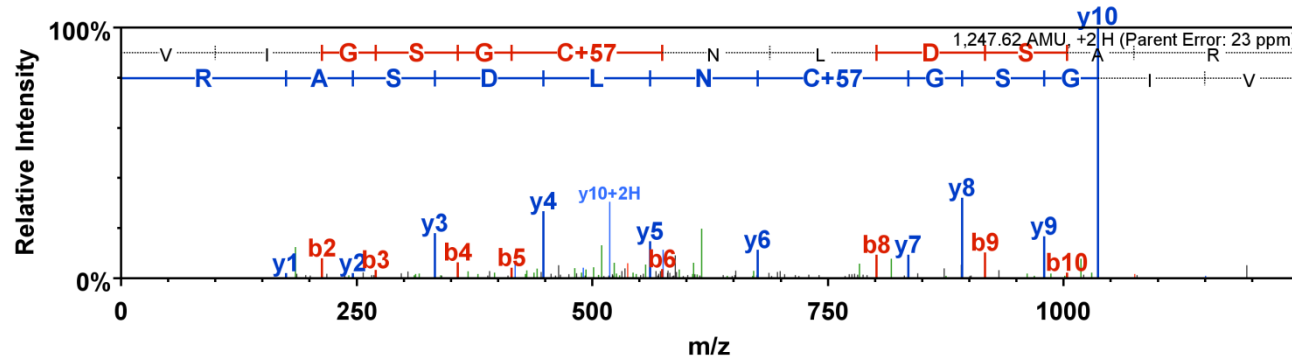

|                                  |            |                 |                |      |      |        |          |   |    |
|----------------------------------|------------|-----------------|----------------|------|------|--------|----------|---|----|
| Ig gamma chain C region, partial | EMC81142.1 | 4.72 / 10826.22 | GFYPEDVSVIEWQK | 76.7 | None | 792.40 | 1,582.79 | 2 | 36 |
|----------------------------------|------------|-----------------|----------------|------|------|--------|----------|---|----|

15

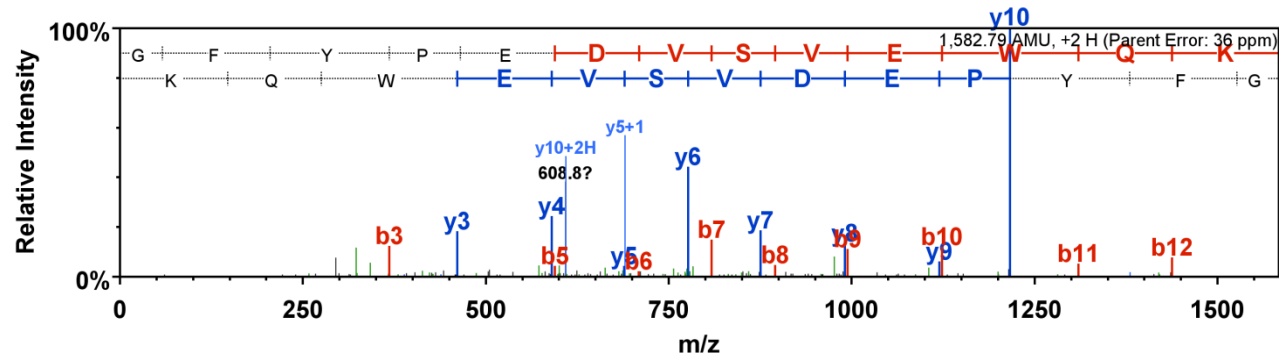

|                                           |            |                |            |      |           |        |          |   |     |
|-------------------------------------------|------------|----------------|------------|------|-----------|--------|----------|---|-----|
| Ig heavy chain V-III region VH26, partial | KFQ92087.1 | 5.10 / 6711.43 | STVTLMNSLK | 59.5 | Oxidation | 619.32 | 1,236.62 | 2 | -17 |
|-------------------------------------------|------------|----------------|------------|------|-----------|--------|----------|---|-----|

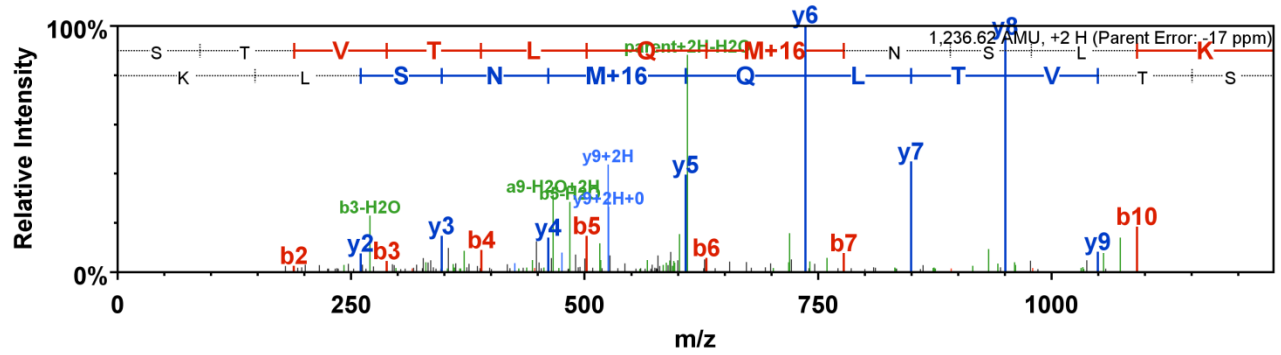

|                                              |            |                |             |      |                       |        |          |   |    |
|----------------------------------------------|------------|----------------|-------------|------|-----------------------|--------|----------|---|----|
| 15 Ig heavy chain V-III region VH26, partial | KFP43328.1 | 8.11 / 6122.75 | ADDTATYYCAK | 72.4 | Carbamido-methylation | 631.82 | 1,261.63 | 2 | 78 |
|----------------------------------------------|------------|----------------|-------------|------|-----------------------|--------|----------|---|----|

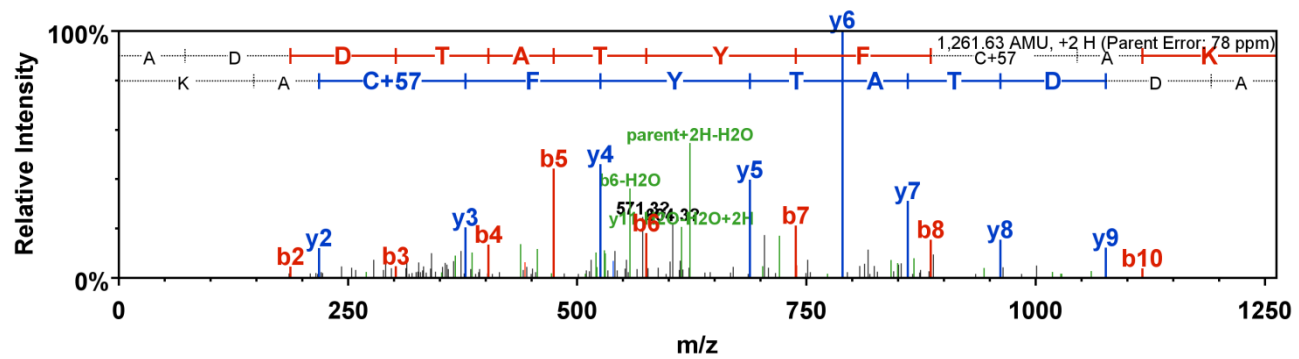



|    |                                                                   |                |                 |           |      |                           |        |          |   |    |
|----|-------------------------------------------------------------------|----------------|-----------------|-----------|------|---------------------------|--------|----------|---|----|
| 18 | PREDICTED:<br>multiple inositol<br>polyphosphate<br>phosphatase 1 | XP_005530788.1 | 6.05 / 50597.88 | CLQSGAAFR | 65.4 | Carbamido-<br>methylation | 505.26 | 1,008.50 | 2 | 22 |
|----|-------------------------------------------------------------------|----------------|-----------------|-----------|------|---------------------------|--------|----------|---|----|

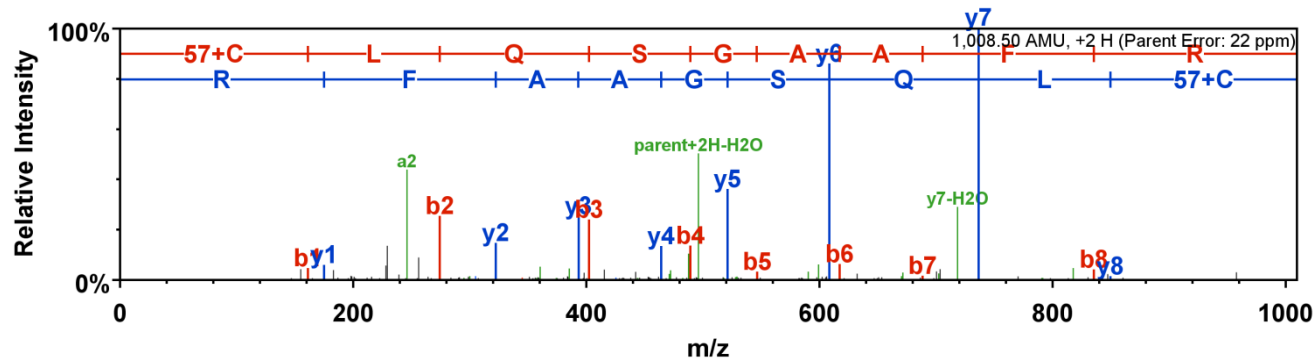

|    |                                                    |                |                  |                  |      |      |        |          |   |     |
|----|----------------------------------------------------|----------------|------------------|------------------|------|------|--------|----------|---|-----|
| 26 | PREDICTED: LOW<br>QUALITY PROTEIN<br>Complement C3 | XP_009322238.1 | 6.62 / 187591.23 | IEGDHNAHVGLVAVDK | 58.4 | None | 558.62 | 1,672.82 | 3 | -18 |
|----|----------------------------------------------------|----------------|------------------|------------------|------|------|--------|----------|---|-----|

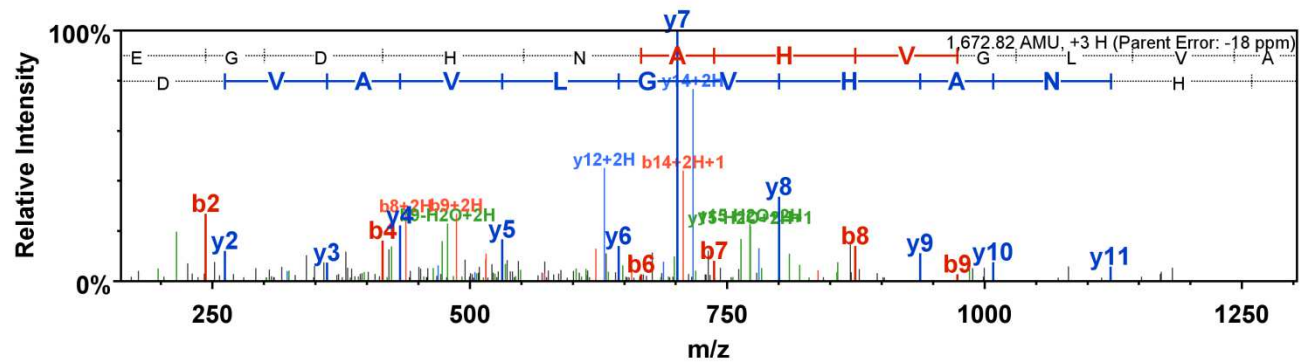

|                              |            |                  |           |      |           |        |          |   |    |
|------------------------------|------------|------------------|-----------|------|-----------|--------|----------|---|----|
| Complement factor H, partial | KFW68593.1 | 7.47 / 126405.91 | LSEYMENYK | 58.1 | Oxidation | 596.81 | 1,191.60 | 2 | 74 |
|------------------------------|------------|------------------|-----------|------|-----------|--------|----------|---|----|

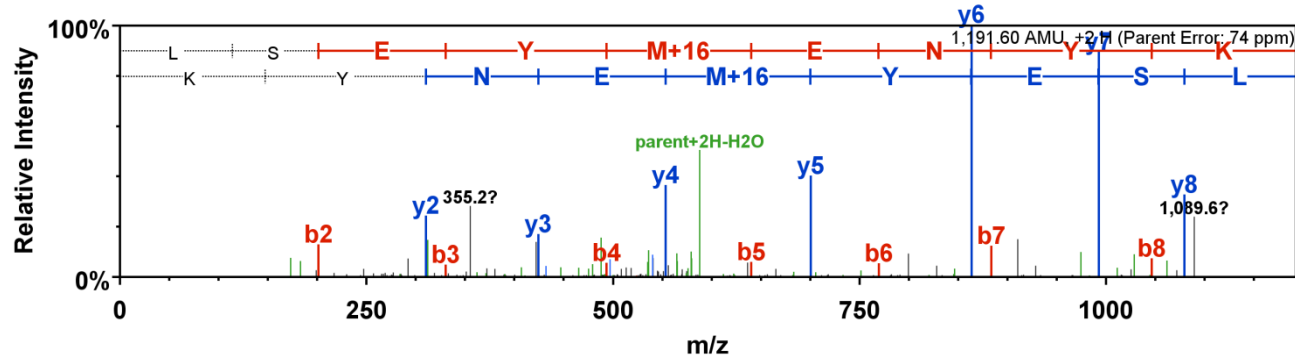

|                                |                |                 |                  |      |      |       |          |   |     |
|--------------------------------|----------------|-----------------|------------------|------|------|-------|----------|---|-----|
| Pyruvate kinase muscle isozyme | XP_009318184.1 | 7.94 / 60260.51 | FGVEQNVDVMVFASFR | 60.7 | None | 930.1 | 1,858.19 | 2 | 150 |
|--------------------------------|----------------|-----------------|------------------|------|------|-------|----------|---|-----|

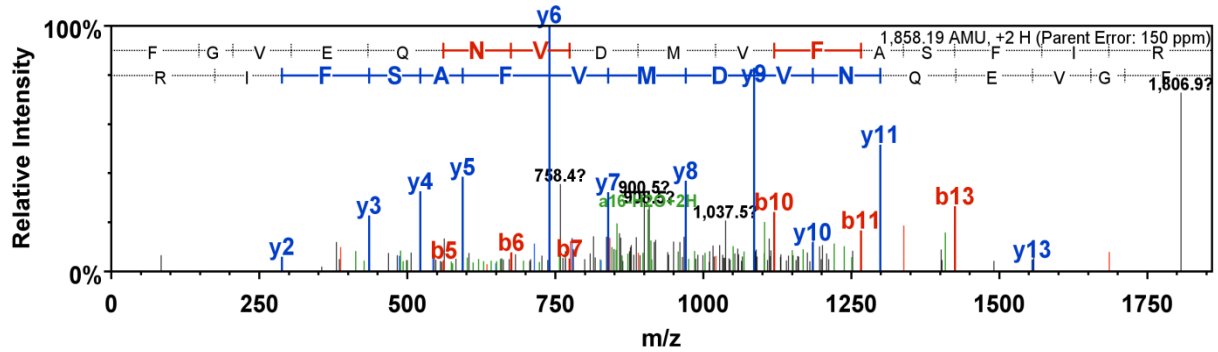

28

All information was extracted from the Scaffold software (Proteome Software, version 3.6.5), or computed using [www.expasy.org/tools/pi-tool](http://www.expasy.org/tools/pi-tool).
